# Supplementary material for: ELaPro, a LOINC-Mapped Core Dataset for Top Laboratory Procedures of Eligibility Screening for Clinical Trials
Source: Research Square preprint supplement (doi:10.21203/rs.3.rs-1132382/v1), 2021-12-15

Appendix 1: Schematic representation of concepts used in the manual analysis of results. UMLS: Unified Medical Language System; EC: Eligibility Criteria; CUI: Concept Unique Identifier; STR: String; n: Frequency of occurrence for a single concept; STY: Semantic Type; PLC: Primary Laboratory Concept; SLC: Secondary Laboratory Concept; nTotal: Total count of occurrences of all relevant concepts; MII: Medical Informatics Initiative; LOINC: Logical Observation Identifiers Names and Codes; LOINC\_NUM: Concept identifier in LOINC terminology.

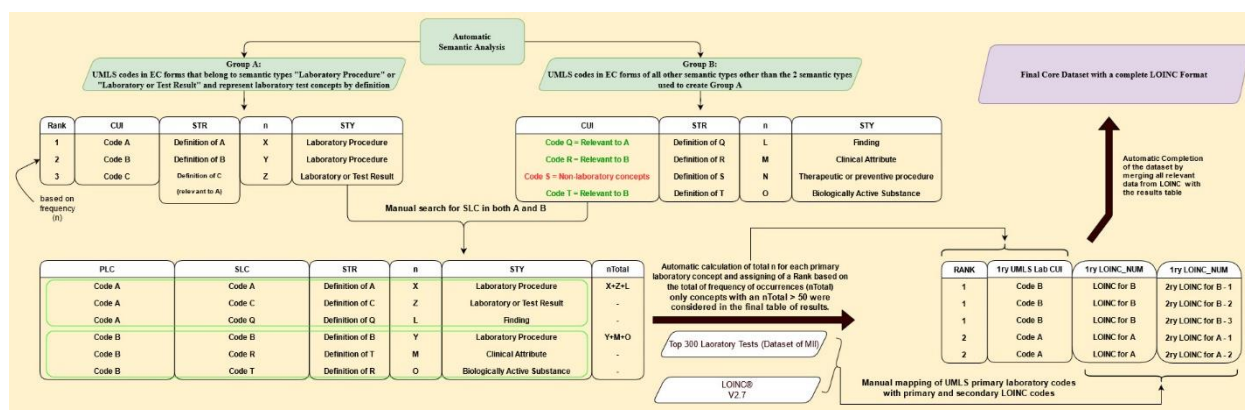

Supplement: Supplementary file [file 43182fca1a2c5f235dec949e.pdf]
