# Supplementary material for: ELaPro, a LOINC-Mapped Core Dataset for Top Laboratory Procedures of Eligibility Screening for Clinical Trials
Source: Research Square preprint supplement (doi:10.21203/rs.3.rs-1132382/v1), 2021-12-15
Supplement: Supplementary file [file f451c8014b55dee1247bbd7b.pdf]

**Appendix 2: Table of MeSH categories in eligibility criteria forms sorted according to absolute frequencies (n).**

| No. | MeSH Category                                                         | n    |
|-----|-----------------------------------------------------------------------|------|
| 1   | Neoplasms [C04]                                                       | 3381 |
| 2   | Cardiovascular Diseases [C14]                                         | 1982 |
| 3   | Immune System Diseases [C20]                                          | 1531 |
| 4   | Skin and Connective Tissue Diseases [C17]                             | 1436 |
| 5   | Nutritional and Metabolic Diseases [C18]                              | 1243 |
| 6   | Endocrine System Diseases [C19]                                       | 1191 |
| 7   | Digestive System Diseases [C06]                                       | 954  |
| 8   | Psychiatry and Psychology [F01-F04]                                   | 880  |
| 9   | Male Urogenital Diseases [C12]                                        | 731  |
| 10  | Hemic and Lymphatic Diseases [C15]                                    | 697  |
| 11  | Nervous System Diseases [C10]                                         | 612  |
| 12  | Musculoskeletal Diseases [C05]                                        | 531  |
| 13  | Pathological Conditions, Signs and Symptoms [C23]                     | 523  |
| 14  | Respiratory Tract Diseases [C08]                                      | 510  |
| 15  | Infections [C01]                                                      | 448  |
| 16  | Female Urogenital Diseases and Pregnancy Complications [C13]          | 409  |
| 17  | Otorhinolaryngologic Diseases [C09]                                   | 63   |
| 18  | Stomatognathic Diseases [C07]                                         | 60   |
| 19  | Vaccines [D20.215.894]                                                | 45   |
| 20  | Congenital, Hereditary, and Neonatal Diseases and Abnormalities [C16] | 44   |
| 21  | Eye Diseases [C11]                                                    | 37   |
| 22  | Chemically-Induced Disorders [C25]                                    | 21   |
| 23  | Wounds and Injuries [C26]                                             | 11   |
